# Supplementary material for: Long-term reduction of T-cell intracellular antigens leads to increased beta-actin expression
Source: PubMed Central journal article supplement (PMC4113145; doi:10.1186/1476-4598-13-90), 2014-04-27

Fig. S2

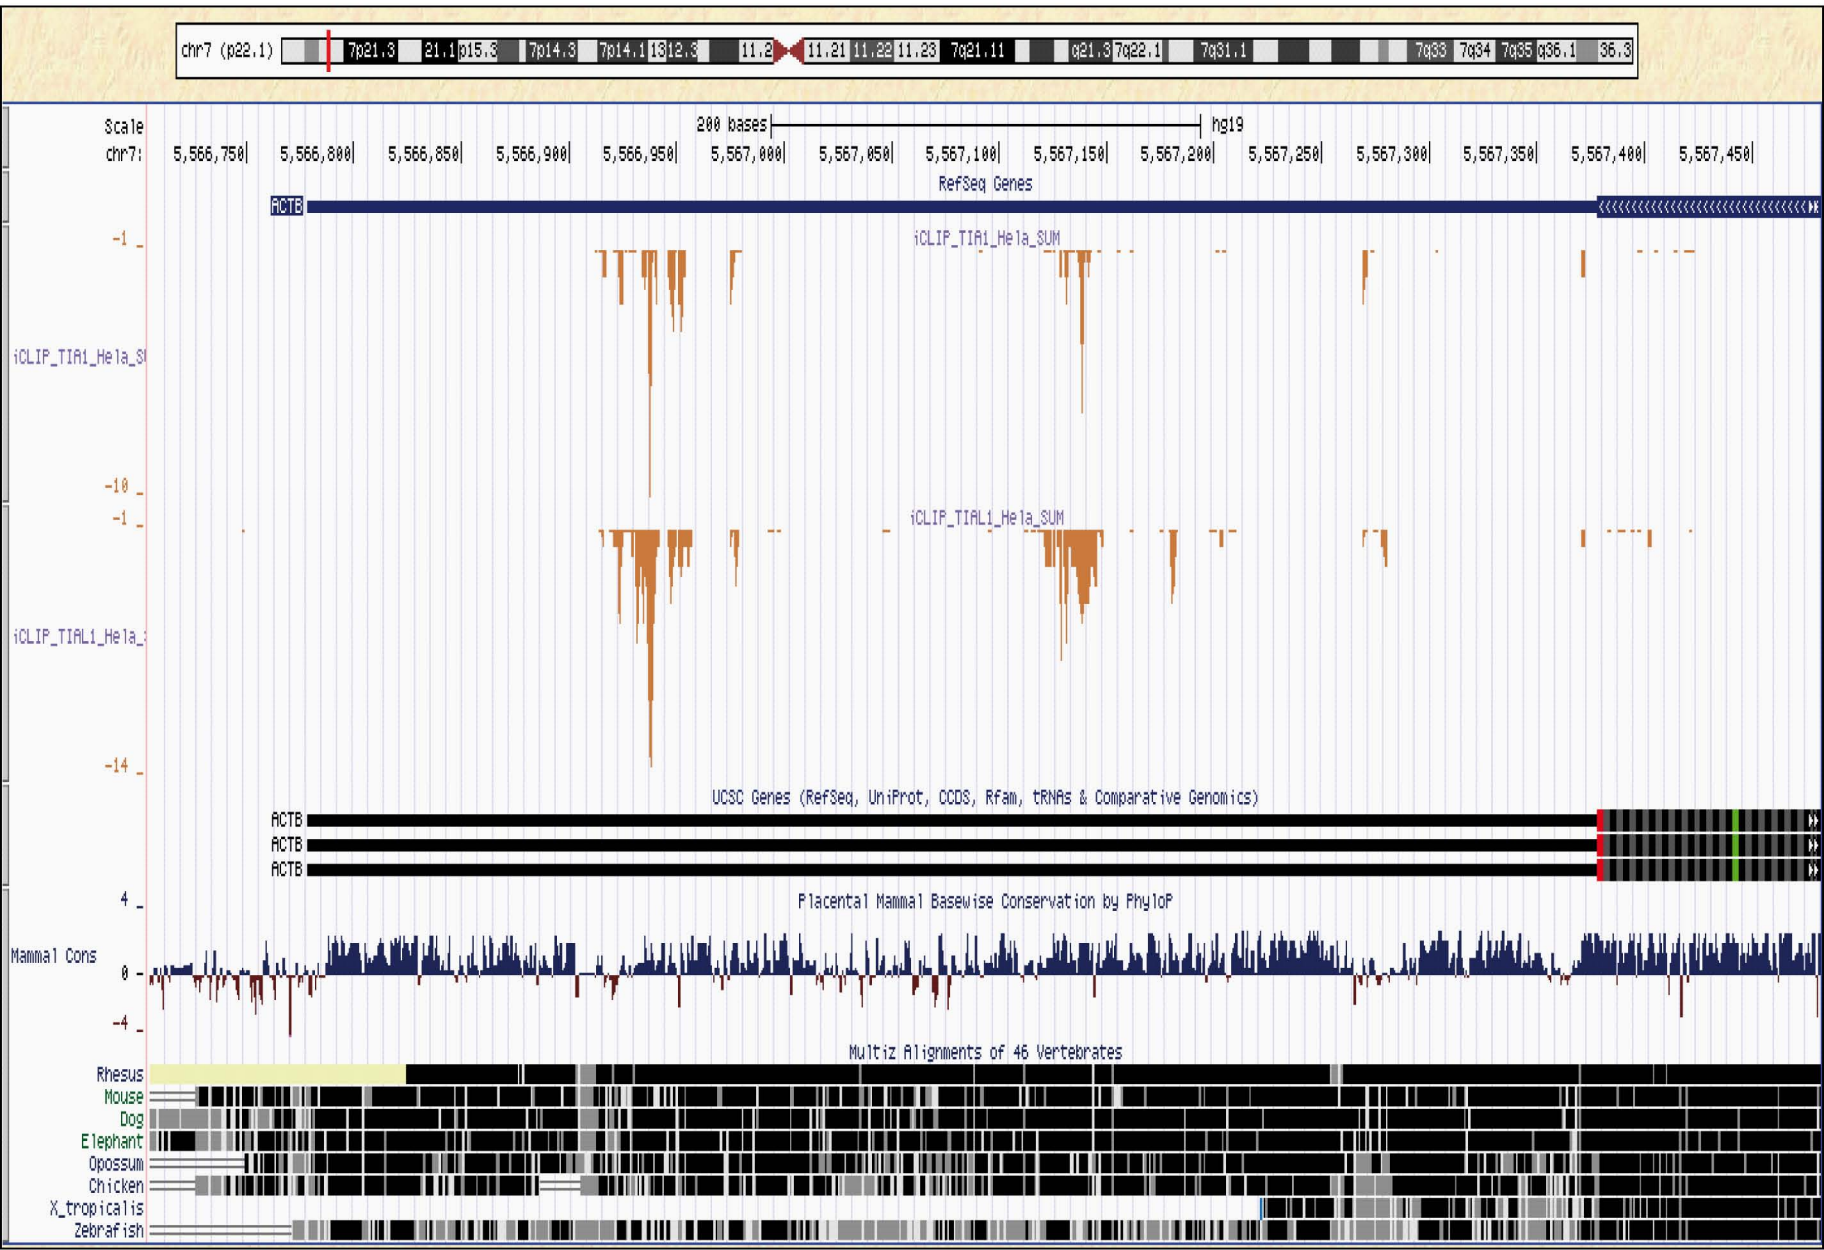





# icCLIP of TIA1/TIAR against ACTB mRNA 3'-UTR (Full-picture, III)

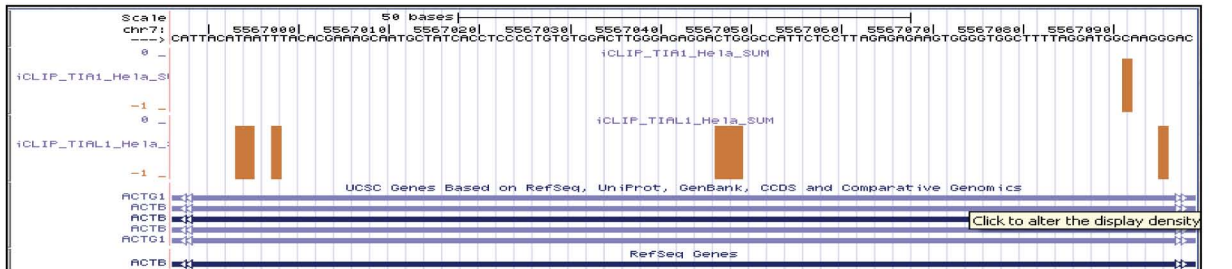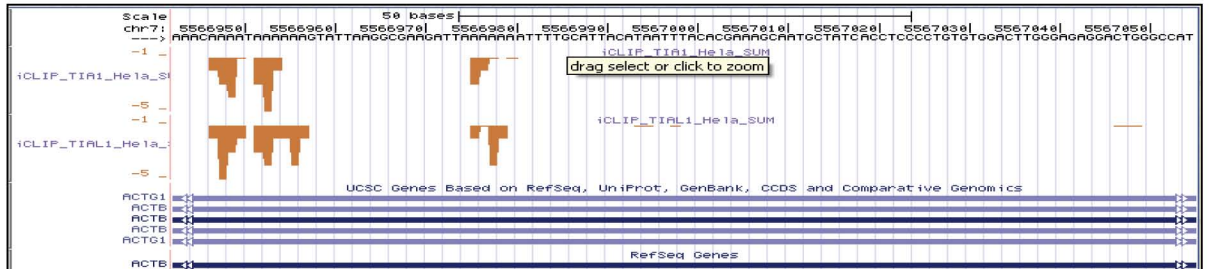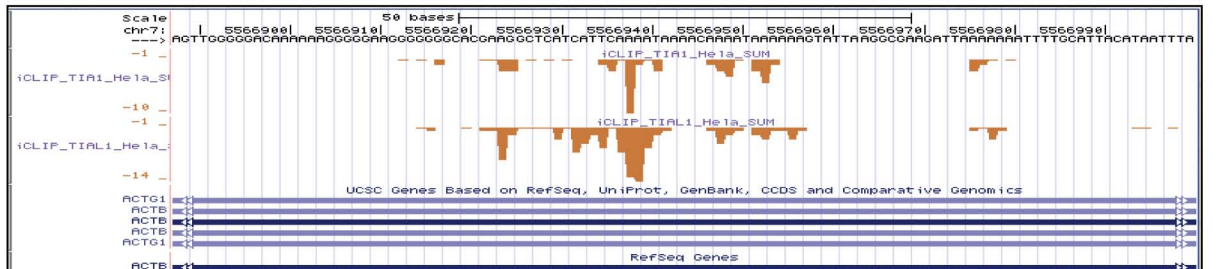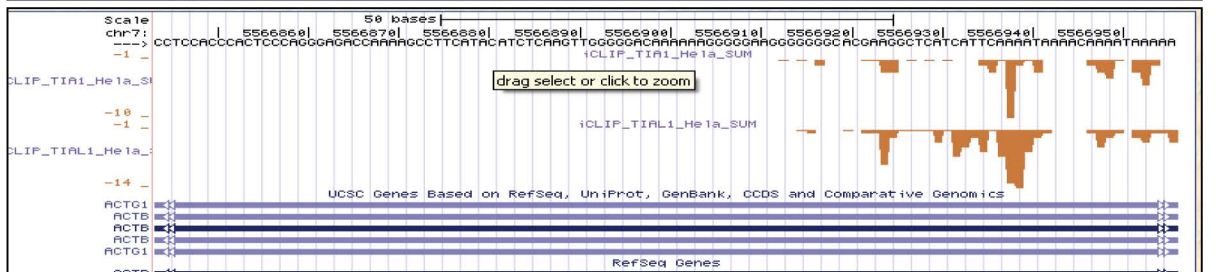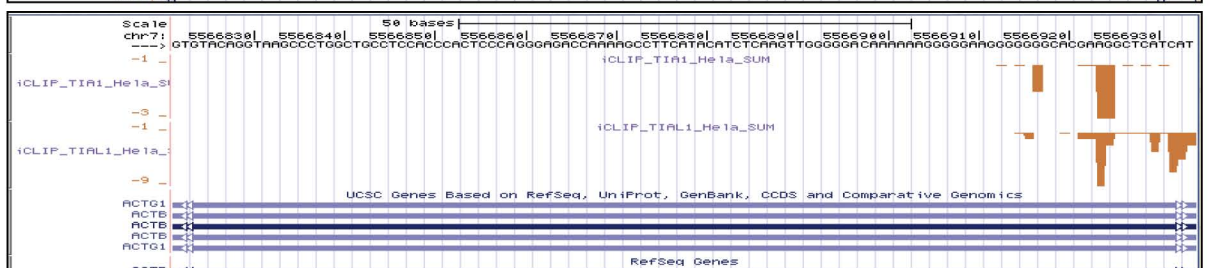

# iCLIP of TIA1/TIAR against ACTB mRNA 3'-UTR (Full-picture, IV)

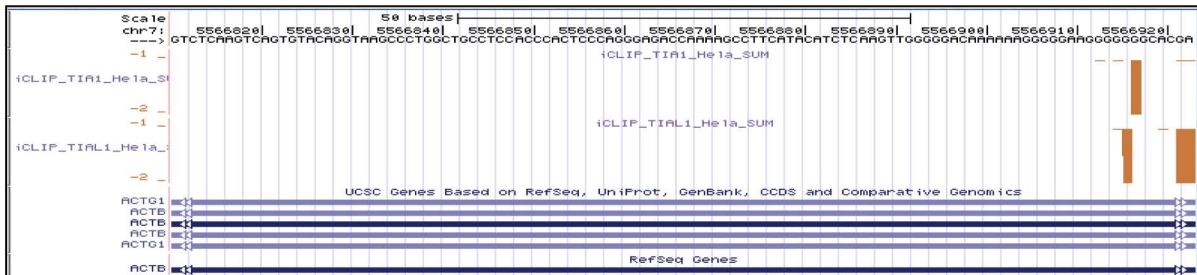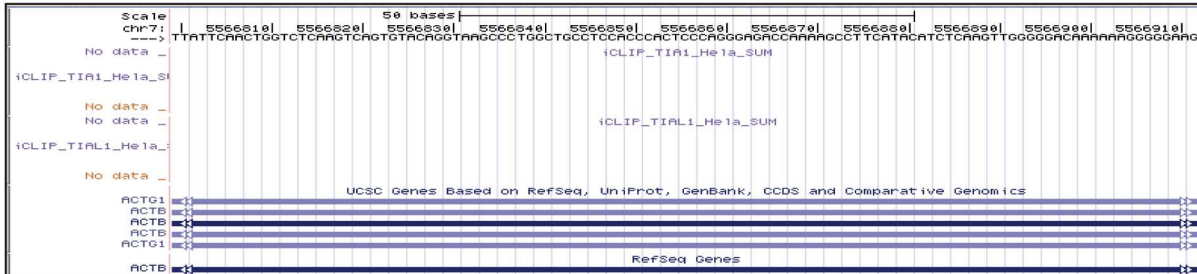

Supplement: 1476-4598-13-90-S2.pdf [file 1476-4598-13-90-S2.pdf]
