# Supplementary material for: Long-term reduction of T-cell intracellular antigens leads to increased beta-actin expression
Source: PubMed Central journal article supplement (PMC4113145; doi:10.1186/1476-4598-13-90), 2014-04-27

Fig. S3

A

RT-PCR-PAT: RT-PCR-Poly(A) Tail Test

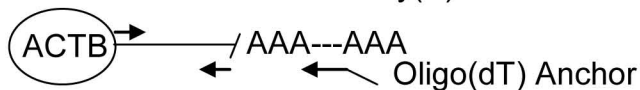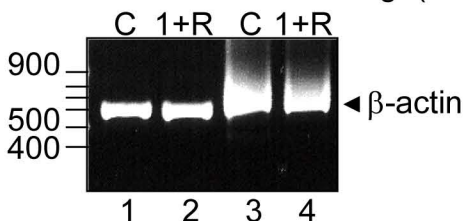

B

RACE-PAT: Rapid Amplification of cDNA Ends-PAT

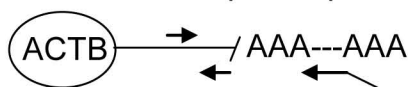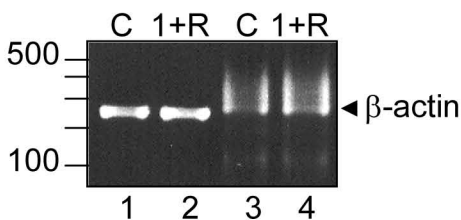

C

RLC-PAT: RNA-Ligation-Coupled-PAT

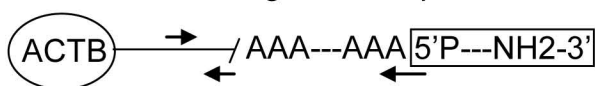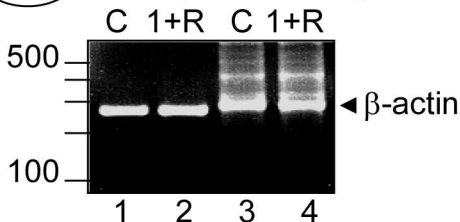

Supplement: 1476-4598-13-90-S3.pdf [file 1476-4598-13-90-S3.pdf]
