# Supplementary material for: Long-term reduction of T-cell intracellular antigens leads to increased beta-actin expression
Source: PubMed Central journal article supplement (PMC4113145; doi:10.1186/1476-4598-13-90), 2014-04-27

Fig. S4

A

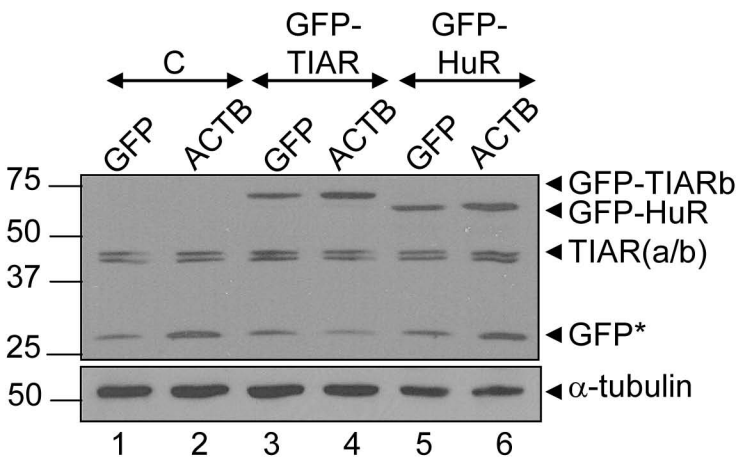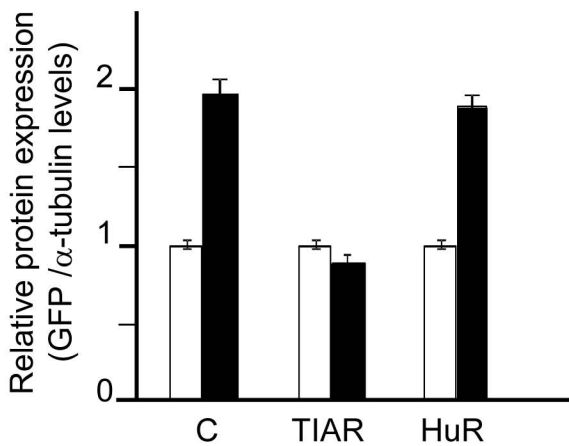

Supplement: 1476-4598-13-90-S4.pdf [file 1476-4598-13-90-S4.pdf]
